# Supplementary material for: A systematic review of passive data for remote monitoring in psychosis and schizophrenia
Source: Springer Nature journal article supplement (doi:10.1038/s41746-025-01451-2), 2025-01-27
Supplement: 41746_2025_1451_MOESM1_ESM.pdf [file 41746_2025_1451_MOESM1_ESM.pdf]

## **Supplementary file for *A systematic review of passive data for remote monitoring in psychosis and schizophrenia***

### **Glossary of terms**

Epoch – duration of recording intervals. Term is commonly used in relation to accelerometer and actigraphy devices, where activity counts are summarised for a defined epoch, e.g. 30 seconds, 1 minute, 5 minutes etc.

Pedometer – device that measures an individual's movement and converts it into a step count. Can either contain a mechanical switch or accelerometer sensors that detect movement

Actigraphs – devices commonly used in research settings to monitor people's rest/activity profiles. They use accelerometers to measure activity, some also contain gyroscope and light sensors.

Accelerometer - electronic sensor that measures the acceleration forces acting on an object, to determine the object's position in space and monitor the object's movement.

Magnetometer - a sensor that converts the magnitude and variations of a magnetic field into electric signals. Magnetic fields, as exemplified by the magnetic field of the earth (earth magnetism) or magnets are familiar yet invisible phenomena.

Gyroscope - device used for measuring or maintaining orientation and angular velocity.

Global Positioning System (GPS) Sensors - receivers with antennas that use a satellite-based navigation system with a network of 24 satellites in orbit around the earth to provide position, velocity, and timing information. Collects the relative degrees of latitude and longitude data from GPS and/or using cell tower and WiFi signals.

Photoplethysmography (PPG) - consists of a light source, typically an LED, and a photodetector. The LED emits light that is absorbed by the tissue in the wrist, and the photodetector measures the amount of light that is transmitted through or reflected from the tissue. PPG is a non-invasive technology that uses a light source and a photodetector at the surface of skin to measure the volumetric variations of blood circulation.

Microphone – is a sound sensor converting sound to electric signals.

Bluetooth - is a short-range wireless technology standard that is used for exchanging data between fixed and mobile devices over short distances. Devices connected in a Bluetooth network communicate with each other using ultra-high frequency (UHF) radio waves, which are electromagnetic waves.

Temperature sensor - physical sensor that detects and measures heat and cold, and converts it into an electrical signal.

Light sensor - an ambient light sensor is a component in smartphones, notebooks, other mobile devices, automotive displays and LCD TVs. It is a photodetector that is used to sense the amount of ambient light present, and appropriately dim the device's screen to match it.

Features – variables that are extracted or derived from raw sensor data. For example, raw accelerometer data can be transformed into activity counts, step counts or minutes of sedentary behaviour etc.

Digital phenotyping - “moment-by-moment quantification of the individual-level human phenotype in-situ using data from smartphones and other personal digital devices.” Torous et al, 2016, doi: 10.2196/mental.5165

### **Search strings**

1. psychosis or psychoses or psychotic or schizo\* or SMI or “severe mental illness” or “serious mental illness” or paranoia or paranoid or hallucinat\* or delusion\* or grandios\* or suspicio\* or “thought disorder” or “positive symptoms” or “negative symptoms” or “hearing voices” or “voice hear\*” or “unusual beliefs” or persecut\*

#### **AND either**

2. "digital monitoring" or "digitally monitor" or "remote monitoring" or "remotely monitored" or "RMT" or "remote measurement technologies" or passive\* or sensor or sensors or sensing or wearable or smartphone or "smart phone" or "mobile phone" or apps or app or "smart watch" or smartwatch or mhealth or "digital biomarker" or "digital phenotyp\*" or “wrist-worn” or “electronic monitoring” or “GPS” or “Global Positioning System” or “remote sensing technology” or “nearables”

#### **OR**

3. acceleromet\* or pedomet\* or actigraph\* or “bed sensor” or “motor activity” or “psychomotor activity” or “rest-activity” or “rest activity” or “physical activity”

### **Amendments to protocol**

The review was registered on Prospero (CRD 42023469868). Two amendments were made to the protocol after registration:

1. Additional exclusion criteria – studies where passive data was collected in controlled experimental conditions only, or only during certain tasks
2. Due to the number of studies included and the variation of types of studies we decided to only do quality assessment on studies where they had developed or validated a prediction model or assessed prognostic factors. We felt this was appropriate as the main focus of our review was to describe the methods used to process passive data, not the outcomes of the individual studies.

## Database searches

Searches first run on 13<sup>th</sup> June 2023, then updated on 24<sup>th</sup> April 2024.

**Supplementary Table 1.** Search strategy for Embase & Medline, both accessed through Ovid.

| Search | Terms                                                                                                                                                                                                                                                                                                                                                                                                                                                                                             |
|--------|---------------------------------------------------------------------------------------------------------------------------------------------------------------------------------------------------------------------------------------------------------------------------------------------------------------------------------------------------------------------------------------------------------------------------------------------------------------------------------------------------|
| 1      | (psychosis or psychoses or psychotic or schizo* or SMI or "severe mental illness" or "serious mental illness" or paranoia or paranoid or hallucinat* or delusion* or grandios* or suspicio* or "thought disorder" or "positive symptoms" or "negative symptoms" or "hearing voices" or "voice hear*" or "unusual beliefs" or persecut*)<br>ti,kw,ab                                                                                                                                               |
| 2      | "digital monitoring" or "digitally monitor" or "remote monitoring" or "remotely monitored" or "RMT" or "remote measurement technologies" or passive* or sensor or sensors or sensing or wearable or smartphone or "smart phone" or "mobile phone" or apps or app or "smart watch" or smartwatch or mhealth or "digital biomarker" or "digital phenotyp*" or "wrist-worn" or "electric monitoring" or "GPS" or "global positioning system" or "remote sensing technology" or "nearables").ti,kw,ab |
| 3      | 1 and 2                                                                                                                                                                                                                                                                                                                                                                                                                                                                                           |
| 4      | Limit 3 to 2007 onwards                                                                                                                                                                                                                                                                                                                                                                                                                                                                           |
| 5      | (acceleromet* or pedomet* or actigraph* or "bed sensor" or "motor activity" or "psychomotor activity" or "rest-activity" or "rest activity" or "physical activity").ti,kw,ab.                                                                                                                                                                                                                                                                                                                     |
| 6      | 1 and 5                                                                                                                                                                                                                                                                                                                                                                                                                                                                                           |
| 7      | 4 or 6                                                                                                                                                                                                                                                                                                                                                                                                                                                                                            |

**Supplementary Table 2.** Search strategy for PsychInfo, accessed through Ovid.

| Search | Terms                                                                                                                                                                                                                                                                                                                                                                                                                                                                                          |
|--------|------------------------------------------------------------------------------------------------------------------------------------------------------------------------------------------------------------------------------------------------------------------------------------------------------------------------------------------------------------------------------------------------------------------------------------------------------------------------------------------------|
| 1      | (psychosis or psychoses or psychotic or schizo* or SMI or "severe mental illness" or "serious mental illness" or paranoia or paranoid or hallucinat* or delusion* or grandios* or suspicio* or "thought disorder" or "positive symptoms" or "negative symptoms" or "hearing voices" or "voice hear*" or "unusual beliefs" or persecut*)<br>ti,,ab                                                                                                                                              |
| 2      | "digital monitoring" or "digitally monitor" or "remote monitoring" or "remotely monitored" or "RMT" or "remote measurement technologies" or passive* or sensor or sensors or sensing or wearable or smartphone or "smart phone" or "mobile phone" or apps or app or "smart watch" or smartwatch or mhealth or "digital biomarker" or "digital phenotyp*" or "wrist-worn" or "electric monitoring" or "GPS" or "global positioning system" or "remote sensing technology" or "nearables").ti,ab |
| 3      | 1 and 2                                                                                                                                                                                                                                                                                                                                                                                                                                                                                        |
| 4      | Limit 3 to 2007 onwards                                                                                                                                                                                                                                                                                                                                                                                                                                                                        |

|   |                                                                                                                                                                            |
|---|----------------------------------------------------------------------------------------------------------------------------------------------------------------------------|
| 5 | (acceleromet* or pedomet* or actigraph* or "bed sensor" or "motor activity" or "psychomotor activity" or "rest-activity" or "rest activity" or "physical activity").ti,ab. |
| 6 | 1 and 5                                                                                                                                                                    |
| 7 | 4 or 6                                                                                                                                                                     |

Search strategy for CINAHL, accessed through EBSCO

TX ( (psychosis or psychoses or psychotic or schizo\* or SMI or "severe mental illness" or "serious mental illness" or paranoia or paranoid or hallucinat\* or delusion\* or grandios\* or suspicio\* or "thought disorder" or "positive symptoms" or "negative symptoms" or "hearing voices" or "voice hear\*" or "unusual beliefs" or persecut\* ) AND TX ( ("digital monitoring" or "digitally monitor" or "remote monitoring" or "remotely monitored" or "RMT" or "remote measurement technologies" or passive\* or sensor or sensors or sensing or wearable or smartphone or "smart phone" or "mobile phone" or apps or app or "smart watch" or smartwatch or mhealth or "digital biomarker" or "digital phenotyp\*" or "wrist-worn" or "electric monitoring" or "GPS" or "global positioning system" or "remote sensing technology" or "nearables" ) )

TX ( (acceleromet\* or pedomet\* or actigraph\* or "bed sensor" or "motor activity" or "psychomotor activity" or "rest-activity" or "rest activity" or "physical activity" ) AND ( (psychosis or psychoses or psychotic or schizo\* or SMI or "severe mental illness" or "serious mental illness" or paranoia or paranoid or hallucinat\* or delusion\* or grandios\* or suspicio\* or "thought disorder" or "positive symptoms" or "negative symptoms" or "hearing voices" or "voice hear\*" or "unusual beliefs" or persecut\* ) )

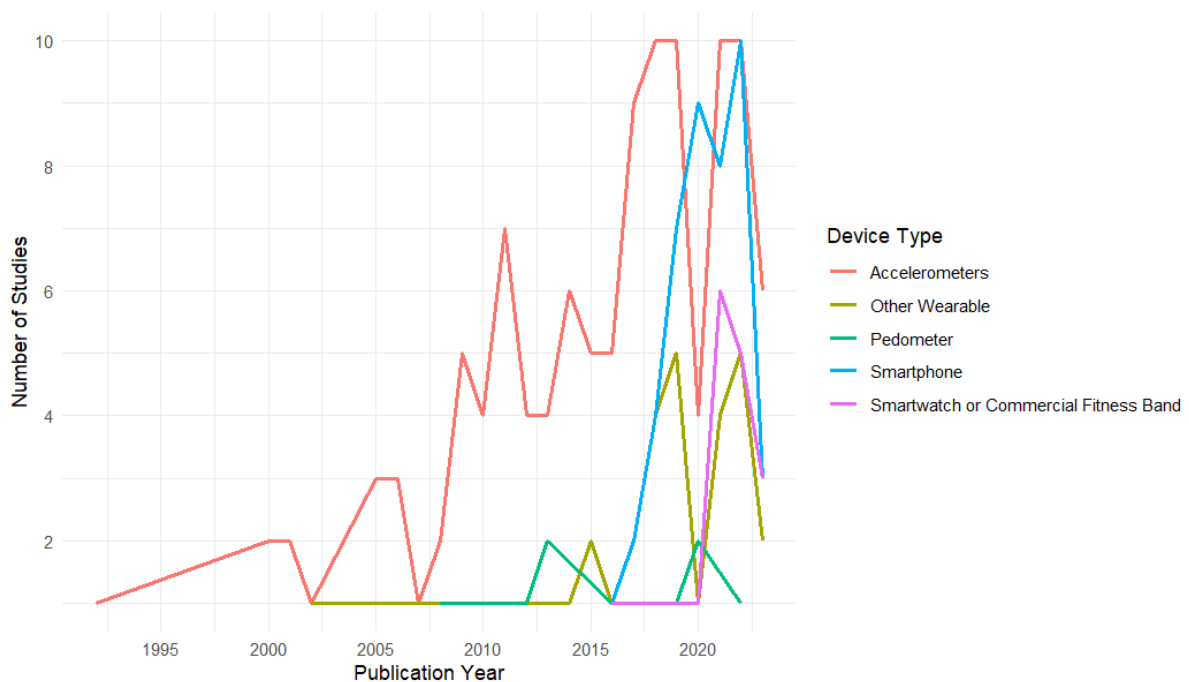

**Supplementary Figure 1.** *Device type by publication year for all included studies.* Each line represents a different device type.

**Supplementary Table 3.** *List of all studies included in the review.*

| 1st Author        | Year | Title                                                                                                                                                                        |
|-------------------|------|------------------------------------------------------------------------------------------------------------------------------------------------------------------------------|
| Abel, D. B.       | 2021 | Quality versus quantity: Determining real-world social functioning deficits in schizophrenia.                                                                                |
| Abel, D. B.       | 2021 | Social functioning in schizophrenia: Comparing laboratory-based assessment with real-world measures.                                                                         |
| Abplanalp, S. J.  | 2021 | Feasibility of using smartphones to capture speech during social interactions in schizophrenia.                                                                              |
| Adler, D. A.      | 2020 | Predicting Early Warning Signs of Psychotic Relapse From Passive Sensing Data: An Approach Using Encoder-Decoder Neural Networks.                                            |
| Adler, D. A.      | 2022 | Machine learning for passive mental health symptom prediction: Generalization across different longitudinal mobile sensing studies.                                          |
| Afonso, P.        | 2010 | Discrepant nocturnal melatonin levels in monozygotic twins discordant for schizophrenia and its impact on sleep.                                                             |
| Afonso, P.        | 2011 | Schizophrenia patients with predominantly positive symptoms have more disturbed sleep-wake cycles measured by actigraphy.                                                    |
| Afonso, P.        | 2011 | Sleep-promoting action of the endogenous melatonin in schizophrenia compared to healthy controls.                                                                            |
| Afonso, P.        | 2014 | Sleep-wake patterns in schizophrenia patients compared to healthy controls.                                                                                                  |
| Amiri, A. M.      | 2019 | Predicting physical activity levels in individuals with schizophrenia through integrated global positioning system and accelerometer data.                                   |
| Andersen, E.      | 2018 | Physical activity pattern and cardiorespiratory fitness in individuals with schizophrenia compared with a population-based sample.                                           |
| Andersen, E.      | 2020 | Effect of high-intensity interval training on cardiorespiratory fitness, physical activity and body composition in people with schizophrenia: A randomized controlled trial. |
| Apiquian, R.      | 2008 | Variations of rest - Activity rhythm and sleep - Wake in schizophrenic patients versus healthy subjects: An actigraphic comparative study.                                   |
| Baandrup, L.      | 2015 | A validation of wrist actigraphy against polysomnography in patients with schizophrenia or bipolar disorder.                                                                 |
| Baandrup, L.      | 2016 | Circadian rest-activity rhythms during benzodiazepine tapering covered by melatonin versus placebo add-on: data derived from a randomized clinical trial.                    |
| Barnett, I.       | 2018 | Relapse prediction in schizophrenia through digital phenotyping: a digital study                                                                                             |
| Bartolomeo, L. A. | 2023 | The positivity offset theory of anhedonia in schizophrenia: evidence for a deficit in daily life using digital phenotyping.                                                  |
| Beebe, L. H.      | 2013 | Description of physical activity in outpatients with schizophrenia spectrum disorders.                                                                                       |
| Beebe, L. H.      | 2013 | A pilot study describing physical activity in persons with schizophrenia spectrum disorders (Ssds) after an exercise program.                                                |
| Bengtsson, J.     | 2021 | Ambulatory Heart Rate Variability in Schizophrenia or Depression: Impact of Anticholinergic Burden and Other Factors.                                                        |
| Ben-Zeev, D.      | 2016 | Mobile Behavioral Sensing for Outpatients and Inpatients With Schizophrenia.                                                                                                 |

|                     |      |                                                                                                                                                                       |
|---------------------|------|-----------------------------------------------------------------------------------------------------------------------------------------------------------------------|
| Ben-Zeev, D.        | 2017 | CrossCheck: Integrating Self-Report, Behavioral Sensing, and Smartphone Use to Identify Digital Indicators of Psychotic Relapse.                                      |
| Ben-Zeev, D.        | 2017 | Use of multimodal technology to identify digital correlates of violence among inpatients with serious mental illness: A pilot study.                                  |
| Ben-Zeev, D.        | 2020 | Mobile RDoC: Using Smartphones to Understand the Relationship Between Auditory Verbal Hallucinations and Need for Care.                                               |
| Berle, J. O.        | 2010 | Actigraphic registration of motor activity reveals a more structured behavioural pattern in schizophrenia than in major depression.                                   |
| Berry, A.           | 2021 | Examining the feasibility, acceptability, validity and reliability of physical activity, sedentary behaviour and sleep measures in people with schizophrenia.         |
| Bioque, M.          | 2023 | Deep brain stimulation and digital monitoring for patients with treatment-resistant schizophrenia and bipolar disorder: A case series.                                |
| Blomqvist, M.       | 2023 | Relationship between Physical Activity and Health Outcomes in Persons with Psychotic Disorders after Participation in a 2-Year Individualized Lifestyle Intervention. |
| Bracht, T.          | 2012 | Comparison of objectively measured motor behavior with ratings of the motor behavior domain of the Bern Psychopathology Scale (BPS) in schizophrenia.                 |
| Bracht, T.          | 2013 | Altered cortico-basal ganglia motor pathways reflect reduced volitional motor activity in schizophrenia.                                                              |
| Brobakken, M. F.    | 2019 | A comprehensive cardiovascular disease risk profile in patients with schizophrenia.                                                                                   |
| Bromundt, V.        | 2011 | Sleep - Wake cycles and cognitive functioning in schizophrenia.                                                                                                       |
| Browne, J.          | 2016 | Work out by walking: A pilot exercise program for individuals with schizophrenia spectrum disorders.                                                                  |
| Browne, J.          | 2021 | Targeting physical health in schizophrenia: Results from the Physical Activity Can Enhance Life (PACE-Life) 24                                                        |
| Browne, J.          | 2023 | Virtual group-based walking intervention for persons with schizophrenia: A pilot randomized controlled trial.                                                         |
| Buck, B.            | 2019 | Capturing behavioral indicators of persecutory ideation using mobile technology.                                                                                      |
| Buck, B.            | 2019 | Relationships between smartphone social behavior and relapse in schizophrenia: A preliminary report.                                                                  |
| Buck, B.            | 2022 | The relationship between appraisals of auditory verbal hallucinations and real-time affect and social functioning.                                                    |
| Bueno-Antequera, J. | 2018 | Sedentary behaviour, physical activity, cardiorespiratory fitness and cardiometabolic risk in psychosis: The PsychiActive project.                                    |
| Bueno-Antequera, J. | 2018 | Ideal cardiovascular health and its association with sedentary behaviour and fitness in psychiatric patients. The PsychiActive project.                               |
| Cella, M.           | 2018 | Using wearable technology to detect the autonomic signature of illness severity in schizophrenia.                                                                     |
| Cella, M.           | 2019 | Blending active and passive digital technology methods to improve symptom monitoring in early psychosis.                                                              |
| Cella, M.           | 2022 | Evaluating the mechanisms of social cognition intervention in schizophrenia: A proof-of-concept trial.                                                                |
| Chen, L. J.         | 2016 | Association between actigraphy-derived physical activity and cognitive performance in patients with schizophrenia.                                                    |
| Chen, L. J.         | 2022 | Associations between daily steps and cognitive function among inpatients with schizophrenia.                                                                          |

|                  |      |                                                                                                                                                                                                                |
|------------------|------|----------------------------------------------------------------------------------------------------------------------------------------------------------------------------------------------------------------|
| Chen, M. D.      | 2017 | A pilot comparative study of one-way versus two-way text message program to promote physical activity among people with severe mental illness.                                                                 |
| Chung, K. F.     | 2018 | Correlates of sleep irregularity in schizophrenia.                                                                                                                                                             |
| Chung, K. F.     | 2020 | Subjective-Objective Sleep Discrepancy in Schizophrenia.                                                                                                                                                       |
| Cochran, J. M.   | 2021 | Characterization of activity behavior using a digital medicine system and comparison to medication ingestion in patients with serious mental illness.                                                          |
| Cochran, J. M.   | 2022 | Participant Engagement and Symptom Improvement: Aripiprazole Tablets with Sensor for the Treatment of Schizophrenia.                                                                                           |
| Cohen, A.        | 2023 | Relapse prediction in schizophrenia with smartphone digital phenotyping during COVID-19                                                                                                                        |
| Cohen, A. S.     | 2022 | Natural Language Processing and Psychosis: On the Need for Comprehensive Psychometric Evaluation.                                                                                                              |
| De Girolamo, G.  | 2020 | DAily time use, Physical Activity, quality of care and interpersonal relationships in patients with Schizophrenia spectrum disorders (DiAPASon): An Italian multicentre study.                                 |
| Deenik, J.       | 2017 | Physical activity and quality of life in long-term hospitalized patients with severe mental illness: A cross-sectional study.                                                                                  |
| Deenik, J.       | 2018 | Improved psychosocial functioning and quality of life in inpatients with severe mental illness receiving a multidisciplinary lifestyle enhancing treatment. The MULTI study II.                                |
| Deenik, J.       | 2019 | Changes in physical and psychiatric health after a multidisciplinary lifestyle enhancing treatment for inpatients with severe mental illness: The MULTI study I.                                               |
| Dennison, C. A.  | 2021 | Association of genetic liability for psychiatric disorders with accelerometer-assessed physical activity in the UK Biobank.                                                                                    |
| Depp, C. A.      | 2019 | GPS mobility as a digital biomarker of negative symptoms in schizophrenia: a case control study.                                                                                                               |
| Diamond, R.      | 2022 | The physical activity profiles of patients with persecutory delusions.                                                                                                                                         |
| Docx, L.         | 2013 | Quantitative psychomotor dysfunction in schizophrenia: A loss of drive, impaired movement execution or both?                                                                                                   |
| Duncan, M. J.    | 2017 | Revisiting the International Physical Activity Questionnaire (IPAQ): Assessing physical activity among individuals with schizophrenia.                                                                         |
| Duncan, M. J.    | 2019 | Revisiting the International Physical Activity Questionnaire (IPAQ): Assessing sitting time among individuals with schizophrenia.                                                                              |
| Engh, J. A.      | 2019 | Objectively assessed daily steps-not light intensity physical activity, moderate-to-vigorous physical activity and sedentary time-is associated with cardiorespiratory fitness in patients with schizophrenia. |
| Fang, S. H.      | 2016 | Associations between sleep quality and inflammatory markers in patients with schizophrenia.                                                                                                                    |
| Farrow, T. F. D. | 2005 | Structural brain correlates of unconstrained motor activity in people with schizophrenia.                                                                                                                      |
| Farrow, T. F. D. | 2006 | Modafinil and unconstrained motor activity in schizophrenia: Double-blind crossover placebo-controlled trial.                                                                                                  |
| Farrow, T. F. D. | 2009 | A neuroanatomical basis for the frequency of discrete spontaneous activities in schizophrenia.                                                                                                                 |
| Fasmer, E. E.    | 2018 | Graph theory applied to the analysis of motor activity in patients with schizophrenia and depression.                                                                                                          |
| Faulkner, G.     | 2006 | Validation of a physical activity assessment tool for individuals with schizophrenia.                                                                                                                          |



|                   |      |                                                                                                                                                                                                                       |
|-------------------|------|-----------------------------------------------------------------------------------------------------------------------------------------------------------------------------------------------------------------------|
| Firth, J.         | 2018 | The validity and value of self-reported physical activity and accelerometry in people with schizophrenia: A population-scale study of the UK biobank.                                                                 |
| Fowler, J. C.     | 2021 | Hummingbird study: Results from an exploratory trial assessing the performance and acceptance of a digital medicine system in adults with schizophrenia, schizoaffective disorder, or first-episode psychosis.        |
| Fulford, D.       | 2021 | Smartphone sensing of social interactions in people with and without schizophrenia.                                                                                                                                   |
| Gardos, G.        | 1992 | Quantitative assessment of psychomotor activity in patients with neuroleptic-induced akathisia.                                                                                                                       |
| Gomes, E.         | 2014 | Effects of a group physical activity program on physical fitness and quality of life in individuals with schizophrenia.                                                                                               |
| Gomes, E.         | 2016 | Quality of life and physical activity levels in outpatients with schizophrenia.                                                                                                                                       |
| Gorczynski, P.    | 2014 | Examining strategies to improve accelerometer compliance for individuals living with schizophrenia.                                                                                                                   |
| Gorczynski, P.    | 2014 | Examining the efficacy and feasibility of exercise counseling in individuals with schizophrenia: A single-case experimental study.                                                                                    |
| Gothelf, D.       | 2002 | Weight gain associated with increased food intake and low habitual activity levels in male adolescent schizophrenic inpatients treated with olanzapine.                                                               |
| Grassmann, V.     | 2017 | The relationship between moderate-to-vigorous physical activity and executive function among individuals with schizophrenia: Differences by illness duration.                                                         |
| Heidary, Z.       | 2021 | A Rest Quality Metric Using a Cluster-Based Analysis of Accelerometer Data and Correlation With Digital Medicine Ingestion Data: Algorithm Development.                                                               |
| Henson, P.        | 2020 | Towards clinically actionable digital phenotyping targets in schizophrenia.                                                                                                                                           |
| Henson, P.        | 2020 | Impact of dynamic greenspace exposure on symptomatology in individuals with schizophrenia.                                                                                                                            |
| Henson, P.        | 2021 | Anomaly detection to predict relapse risk in schizophrenia.                                                                                                                                                           |
| Henson, P.        | 2021 | Investigating Associations Between Screen Time and Symptomatology in Individuals With Serious Mental Illness: Longitudinal Observational Study.                                                                       |
| He-Yueya, J.      | 2020 | Assessing the relationship between routine and schizophrenia symptoms with passively sensed measures of behavioral stability.                                                                                         |
| Hofstetter, J. R. | 2005 | Quality of sleep in patients with schizophrenia is associated with quality of life and coping.                                                                                                                        |
| Holmen, T. L.     | 2019 | The Association Between Cardiorespiratory Fitness and Cognition Appears Neither Related to Current Physical Activity Nor Mediated by Brain-Derived Neurotrophic Factor in a Sample of Outpatients With Schizophrenia. |
| Holt, R. I. G.    | 2019 | Structured lifestyle education for people with schizophrenia, schizoaffective disorder and first-episode psychosis (STEPWISE): randomised controlled trial.                                                           |
| Ifrah, C.         | 2020 | Cognitive insight and autonomic regulation during daily functioning in individuals with schizophrenia.                                                                                                                |
| Janney, C. A.     | 2013 | Sedentary behavior and psychiatric symptoms in overweight and obese adults with schizophrenia and schizoaffective disorders (WAIST Study).                                                                            |
| Janney, C. A.     | 2015 | Physical activity and sedentary behavior measured objectively and subjectively in overweight and obese adults with schizophrenia or schizoaffective disorders.                                                        |
| Jerome, G. J.     | 2009 | Physical activity levels of persons with mental illness attending psychiatric rehabilitation programs.                                                                                                                |

|                    |      |                                                                                                                                                                                                   |
|--------------------|------|---------------------------------------------------------------------------------------------------------------------------------------------------------------------------------------------------|
| Jongs, N.          | 2020 | A framework for assessing neuropsychiatric phenotypes by using smartphone-based location data.                                                                                                    |
| Juda, M.           | 2023 | Sleep and Rest-Activity Rhythms in Recovering Patients with Severe Concurrent Mental and Substance Use Disorder: A Pilot Study.                                                                   |
| Kalisperakis, E.   | 2023 | Smartwatch digital phenotypes predict positive and negative symptom variation in a longitudinal monitoring study of patients with psychotic disorders.                                            |
| Kammerer, M. K.    | 2021 | Sleep and circadian rhythm disruption predict persecutory symptom severity in day-to-day life: A combined actigraphy and experience sampling study.                                               |
| Kane, I.           | 2012 | Feasibility of pedometers for adults with schizophrenia: Pilot study.                                                                                                                             |
| Kane, J. M.        | 2013 | First experience with a wireless system incorporating physiologic assessments and direct confirmation of digital tablet ingestions in ambulatory patients with schizophrenia or bipolar disorder. |
| Kas, M. J. H.      | 2024 | Digital behavioural signatures reveal trans-diagnostic clusters of Schizophrenia and Alzheimer's disease patients: Trans-diagnostic clustering of digital biotypes.                               |
| Kearns Murphy, C.  | 2022 | Operation recovery: a feasibility study of an 8 week exercise and lifestyle programme within an Irish first episode psychosis service                                                             |
| Kidd, S. A.        | 2019 | Feasibility and outcomes of a multi-function mobile health approach for the schizophrenia spectrum: APP4                                                                                          |
| Kim, J.            | 2020 | Association of Depression With Functional Mobility in Schizophrenia.                                                                                                                              |
| Kimhy, D.          | 2014 | Aerobic fitness and body mass index in individuals with schizophrenia: Implications for neurocognition and daily functioning.                                                                     |
| Kishimoto, T.      | 2008 | Antipsychotic-induced hyperprolactinemia inhibits the hypothalamo- pituitary-gonadal axis and reduces bone mineral density in male patients with schizophrenia.                                   |
| Kluge, A.          | 2018 | Combining actigraphy, ecological momentary assessment and neuroimaging to study apathy in patients with schizophrenia.                                                                            |
| Knights, J.        | 2019 | Evaluating digital medicine ingestion data from seriously mentally ill patients with a Bayesian Hybrid Model.                                                                                     |
| Kodaka, M.         | 2010 | Misalignments of rest-activity rhythms in inpatients with schizophrenia.                                                                                                                          |
| Krane-Gartiser, K. | 2018 | Motor activity patterns in acute schizophrenia and other psychotic disorders can be differentiated from bipolar mania and unipolar depression.                                                    |
| Kruisdijk, F.      | 2017 | Accelerometer-measured sedentary behaviour and physical activity of inpatients with severe mental illness.                                                                                        |
| Kurebayashi, Y.    | 2017 | Association between altered physical activity and neurocognitive function among people with schizophrenia: A minimum 6                                                                            |
| Kurebayashi, Y.    | 2017 | Correlations between physical activity and neurocognitive domain functions in patients with schizophrenia: A cross-sectional study.                                                               |
| Kuula, L.          | 2022 | Adolescent circadian patterns link with psychiatric problems: A multimodal approach.                                                                                                              |
| Lahti, A. C.       | 2021 | Clinical utility of wearable sensors and patient-reported surveys in patients with schizophrenia: Noninterventional, observational study.                                                         |
| Lakhtakia, T.      | 2022 | Smartphone digital phenotyping, surveys, and cognitive assessments for global mental health: Initial data and clinical correlations from an international first episode psychosis study.          |

|                  |      |                                                                                                                                                                                        |
|------------------|------|----------------------------------------------------------------------------------------------------------------------------------------------------------------------------------------|
| Lamichhane, B.   | 2023 | Psychotic Relapse Prediction in Schizophrenia Patients Using a Personalized Mobile Sensing-Based Supervised Deep Learning Model.                                                       |
| Lederman, O.     | 2017 | Modifiable cardiometabolic risk factors in youth with at-risk mental states: A cross-sectional pilot study.                                                                            |
| Leutwyler, H.    | 2014 | Associations of Schizophrenia Symptoms and Neurocognition With Physical Activity in Older Adults With Schizophrenia.                                                                   |
| Leutwyler, H.    | 2015 | The Impact of a Videogame-Based Pilot Physical Activity Program in Older Adults with Schizophrenia on Subjectively and Objectively Measured Physical Activity.                         |
| Liebenthal, E.   | 2022 | Linguistic and non-linguistic markers of disorganization in psychotic illness.                                                                                                         |
| Lindamer, L. A.  | 2008 | Assessment of physical activity in middle-aged and older adults with schizophrenia.                                                                                                    |
| Liu, G.          | 2019 | Assessing the potential of longitudinal smartphone based cognitive assessment in schizophrenia: A naturalistic pilot study.                                                            |
| Mandel, F.       | 2021 | Neural Networks for Clustered and Longitudinal Data Using Mixed Effects Models.                                                                                                        |
| Martanto, W.     | 2021 | Association between wrist wearable digital markers and clinical status in Schizophrenia.                                                                                               |
| Martin, J.       | 2001 | Actigraphic estimates of circadian rhythms and sleep/wake in older schizophrenia patients.                                                                                             |
| Martin, J. L.    | 2005 | Older schizophrenia patients have more disrupted sleep and circadian rhythms than age-matched comparison subjects.                                                                     |
| Mayeli, A.       | 2023 | Shared and distinct abnormalities in sleep-wake patterns and their relationship with the negative symptoms of Schizophrenia Spectrum Disorder patients.                                |
| Meng, Q.         | 2018 | Effects of chlorpromazine on sleep quality, clinical and emotional measures among patients with schizophrenia.                                                                         |
| Methapatara, W.  | 2011 | Pedometer walking plus motivational interviewing program for Thai schizophrenic patients with obesity or overweight: A 12                                                              |
| Meyer, N.        | 2018 | Capturing Rest-Activity Profiles in Schizophrenia Using Wearable and Mobile Technologies: Development, Implementation, Feasibility, and Acceptability of a Remote Monitoring Platform. |
| Minor, K. S.     | 2022 | Personalizing Interventions Using Real-World Interactions: Improving Symptoms and Social Functioning in Schizophrenia With Tailored Metacognitive Therapy.                             |
| Moran, E. K.     | 2024 | Loneliness in the Daily Lives of People With Mood and Psychotic Disorders.                                                                                                             |
| Mow, J. L.       | 2022 | Smartphone-based mobility metrics capture daily social motivation and behavior in schizophrenia.                                                                                       |
| Mulligan, L. D.  | 2016 | High resolution examination of the role of sleep disturbance in predicting functioning and psychotic symptoms in schizophrenia: A novel experience sampling study.                     |
| Nadesalingam, N. | 2023 | The Behavioral Mapping of Psychomotor Slowing in Psychosis Demonstrates Heterogeneity Among Patients Suggesting Distinct Pathobiology.                                                 |
| Narkhede, S. M.  | 2022 | Machine Learning Identifies Digital Phenotyping Measures Most Relevant to Negative Symptoms in Psychotic Disorders: Implications for Clinical Trials.                                  |
| Nguyen, D. K.    | 2022 | Decision support system for the differentiation of schizophrenia and mood disorders using multiple deep learning models on wearable devices data.                                      |
| Niendam, T. A.   | 2018 | Enhancing early psychosis treatment using smartphone technology: A longitudinal feasibility and validity study.                                                                        |
| Ogasawara, M.    | 2023 | Exploratory Validation of Sleep-Tracking Devices in Patients with Psychiatric Disorders.                                                                                               |

|                       |      |                                                                                                                                                                            |
|-----------------------|------|----------------------------------------------------------------------------------------------------------------------------------------------------------------------------|
| Oliva, V.             | 2023 | Patterns of antipsychotic prescription and accelerometer-based physical activity levels in people with schizophrenia spectrum disorders: A multicenter, prospective study. |
| Orleans-Pobee, M.     | 2022 | Physical Activity Can Enhance Life (PACE-Life): results from a 10-week walking intervention for individuals with schizophrenia spectrum disorders                          |
| Osipov, M.            | 2015 | Objective identification and analysis of physiological and behavioral signs of schizophrenia.                                                                              |
| Parrish, E. M.        | 2020 | Emotional determinants of life-space through GPS and ecological momentary assessment in schizophrenia: What gets people out of the house?                                  |
| Peters-Strickland, T. | 2016 | Usability of a novel digital medicine system in adults with schizophrenia treated with sensor-embedded tablets of aripiprazole.                                            |
| Pieters, L. E.        | 2021 | Exploring the Relationship between Movement Disorders and Physical Activity in Patients with Schizophrenia: An Actigraphy Study.                                           |
| Pieters, L. E.        | 2023 | Combining actigraphy and experience sampling to assess physical activity and sleep in patients with psychosis: A feasibility study.                                        |
| Poon, Y. P. Y.-P.     | 2018 | Delayed sleep-wake phase disorder and delayed sleep-wake phase in schizophrenia: Clinical and functional correlates.                                                       |
| Poyurovsky, M.        | 2000 | Actigraphic monitoring (actigraphy) of circadian locomotor activity in schizophrenic patients with acute neuroleptic-induced akathisia.                                    |
| Price, G. D.          | 2022 | An unsupervised machine learning approach using passive movement data to understand depression and schizophrenia.                                                          |
| Ranjan, T.            | 2022 | Longitudinal symptom changes and association with home time in people with schizophrenia: An observational digital phenotyping study.                                      |
| Ransing, R.           | 2021 | Comparison of actigraphy indices among patients with depression and schizophrenia: A preliminary study.                                                                    |
| Raugh, I. M.          | 2020 | Geolocation as a Digital Phenotyping Measure of Negative Symptoms and Functional Outcome.                                                                                  |
| Raugh, I. M.          | 2021 | Digital phenotyping adherence, feasibility, and tolerability in outpatients with schizophrenia.                                                                            |
| Reeve, S.             | 2019 | Sleep Disorders in Early Psychosis: Incidence, Severity, and Association with Clinical Symptoms.                                                                           |
| Reinertsen, E.        | 2017 | Continuous assessment of schizophrenia using heart rate and accelerometer data.                                                                                            |
| Reinertsen, E.        | 2018 | Multiscale network dynamics between heart rate and locomotor activity are altered in schizophrenia.                                                                        |
| Reshef, A.            | 2013 | The effects of acupuncture treatment on sleep quality and on emotional measures among individuals living with schizophrenia: A pilot study.                                |
| Robillard, R.         | 2015 | Ambulatory sleep-wake patterns and variability in young people with emerging mental disorders.                                                                             |
| Rodriguez-Ruiz, J. G. | 2022 | Classification of Depressive and Schizophrenic Episodes Using Night-Time Motor Activity Signal.                                                                            |
| Ryu, J.               | 2020 | Outdoor cycling improves clinical symptoms, cognition and objectively measured physical activity in patients with schizophrenia: A randomized controlled trial.            |
| Sano, W.              | 2012 | Enhanced Persistency of Resting and Active Periods of Locomotor Activity in Schizophrenia.                                                                                 |
| Savage, C. L. G.      | 2021 | Assessing the psychometric properties of the PROMIS sleep measures in persons with psychosis                                                                               |

|                        |      |                                                                                                                                                                                                          |
|------------------------|------|----------------------------------------------------------------------------------------------------------------------------------------------------------------------------------------------------------|
| Scheewe, T. W.         | 2019 | Low physical activity and cardiorespiratory fitness in people with schizophrenia: A comparison with matched healthy controls and associations with mental and physical health.                           |
| Servaas, M. N.         | 2019 | Rigidity in motor behavior and brain functioning in patients with schizophrenia and high levels of apathy.                                                                                               |
| Shamir, E.             | 2000 | Melatonin improves sleep quality of patients with chronic schizophrenia.                                                                                                                                 |
| Sharpe, J. K.          | 2006 | Accelerometry is a valid measure of physical inactivity but not of energy expended on physical activity in people with schizophrenia.                                                                    |
| Shin, S.               | 2016 | Activity monitoring using a mHealth device and correlations with psychopathology in patients with chronic schizophrenia.                                                                                 |
| Skeldon, A. C.         | 2022 | Extracting Circadian and Sleep Parameters from Longitudinal Data in Schizophrenia for the Design of Pragmatic Light Interventions.                                                                       |
| Smit, M. M. C.         | 2022 | Evaluating the implementation of a multidisciplinary lifestyle intervention for people with severe mental illness in sheltered housing: effectiveness-implementation hybrid randomised controlled trial. |
| Soundy, A.             | 2007 | Psychometric Properties of the 7-Day Physical Activity Recall Questionnaire in Individuals with Severe Mental Illness                                                                                    |
| Strauss, G. P.         | 2022 | Validation of accelerometry as a digital phenotyping measure of negative symptoms in schizophrenia.                                                                                                      |
| Stubbs, B.             | 2017 | Physical activity ameliorates the association between sedentary behavior and cardiometabolic risk among inpatients with schizophrenia: A comparison versus controls using accelerometry.                 |
| Stubbs, B.             | 2017 | Relationship between objectively measured sedentary behavior and cognitive performance in patients with schizophrenia vs controls.                                                                       |
| Thomas-Brown, P. G. L. | 2018 | Risperidone provides better improvement of sleep disturbances than haloperidol therapy in schizophrenia patients with Cannabis-Positive urinalysis.                                                      |
| Thonon, B.             | 2022 | A Group Intervention for Motivational Deficits: Preliminary Investigation of a Blended Care Approach Using Ambulatory Assessment.                                                                        |
| Torous, J.             | 2018 | Characterizing the clinical relevance of digital phenotyping data quality with applications to a cohort with schizophrenia.                                                                              |
| Tous-Espelosin, M.     | 2021 | Clinical, physical, physiological, and cardiovascular risk patterns of adults with schizophrenia: CORTEX-SP study: Characterization of adults with schizophrenia.                                        |
| Tseng, V. W. S.        | 2020 | Using behavioral rhythms and multi-task learning to predict fine-grained symptoms of schizophrenia.                                                                                                      |
| Umbricht, D.           | 2020 | Deep Learning-Based Human Activity Recognition for Continuous Activity and Gesture Monitoring for Schizophrenia Patients With Negative Symptoms.                                                         |
| Vancampfort, D.        | 2017 | Lower cardiorespiratory fitness is associated with more time spent sedentary in first episode psychosis: A pilot study.                                                                                  |
| Vancampfort, D.        | 2019 | Validity and correlates of the International Physical Activity Questionnaire in first-episode psychosis.                                                                                                 |
| von Kanel, S.          | 2022 | Measuring catatonia motor behavior with objective instrumentation.                                                                                                                                       |
| Wainberg, M.           | 2021 | Association of accelerometer-derived sleep measures with lifetime psychiatric diagnoses: A cross-sectional study of 89                                                                                   |
| Walther, S.            | 2009 | Increased motor activity in cycloid psychosis compared to schizophrenia.                                                                                                                                 |
| Walther, S.            | 2009 | Quantitative motor activity differentiates schizophrenia subtypes.                                                                                                                                       |
| Walther, S.            | 2009 | Objectively measured motor activity in schizophrenia challenges the validity of expert ratings.                                                                                                          |

|                  |      |                                                                                                                                                                                                         |
|------------------|------|---------------------------------------------------------------------------------------------------------------------------------------------------------------------------------------------------------|
| Walther, S.      | 2010 | Higher motor activity in schizophrenia patients treated with olanzapine versus risperidone.                                                                                                             |
| Walther, S.      | 2011 | Alterations of white matter integrity related to motor activity in schizophrenia.                                                                                                                       |
| Walther, S.      | 2011 | Resting state cerebral blood flow and objective motor activity reveal basal ganglia dysfunction in schizophrenia.                                                                                       |
| Walther, S.      | 2014 | Less structured movement patterns predict severity of positive syndrome, excitement, and disorganization.                                                                                               |
| Walther, S.      | 2015 | The longitudinal course of gross motor activity in schizophrenia - within and between episodes.                                                                                                         |
| Walther, S.      | 2015 | Physical activity in schizophrenia is higher in the first episode than in subsequent ones.                                                                                                              |
| Walther, S.      | 2022 | Low physical activity is associated with two hypokinetic motor abnormalities in psychosis.                                                                                                              |
| Wang, J.         | 2012 | Both physical activity and food intake are associated with metabolic risks in patients with schizophrenia.                                                                                              |
| Waters, F.       | 2011 | Daily variations in sleep-wake patterns and severity of psychopathology: A pilot study in community-dwelling individuals with chronic schizophrenia.                                                    |
| Wichniak, A.     | 2011 | Actigraphic monitoring of activity and rest in schizophrenic patients treated with olanzapine or risperidone.                                                                                           |
| Williams, J.     | 2019 | 'Walk this way': Results from a pilot randomised controlled trial of a health coaching intervention to reduce sedentary behaviour and increase physical activity in people with serious mental illness. |
| Wirz-Justice, A. | 2001 | Disturbed circadian rest-activity cycles in schizophrenia patients: an effect of drugs?                                                                                                                 |
| Wisniewski, H.   | 2019 | Using a Smartphone App to Identify Clinically Relevant Behavior Trends via Symptom Report, Cognition Scores, and Exercise Levels: A Case Series.                                                        |
| Wulff, K.        | 2012 | Sleep and circadian rhythm disruption in schizophrenia.                                                                                                                                                 |
| Zarbo, C.        | 2022 | Assessing adherence to and usability of Experience Sampling Method (ESM) and actigraph in patients with Schizophrenia Spectrum Disorder: A mixed-method study                                           |
| Zarbo, C.        | 2023 | Ecological monitoring of physical activity, emotions and daily life activities in schizophrenia: the DiAPAsen study.                                                                                    |
| Zhou, J.         | 2022 | Predicting Psychotic Relapse in Schizophrenia With Mobile Sensor Data: Routine Cluster Analysis.                                                                                                        |
| Zlatintsi, A.    | 2022 | E-Prevention: Advanced Support System for Monitoring and Relapse Prevention in Patients with Psychotic Disorders Analyzing Long-Term Multimodal Data from Wearables and Video Captures.                 |

**Supplementary Table 4. Completed PRISMA checklist**

| Section and Topic             | Item # | Checklist item                                                                                                                                                                                                                                                                                       | Location where item is reported |
|-------------------------------|--------|------------------------------------------------------------------------------------------------------------------------------------------------------------------------------------------------------------------------------------------------------------------------------------------------------|---------------------------------|
| <b>TITLE</b>                  |        |                                                                                                                                                                                                                                                                                                      |                                 |
| Title                         | 1      | Identify the report as a systematic review.                                                                                                                                                                                                                                                          | Pg 1                            |
| <b>ABSTRACT</b>               |        |                                                                                                                                                                                                                                                                                                      |                                 |
| Abstract                      | 2      | See the PRISMA 2020 for Abstracts checklist.                                                                                                                                                                                                                                                         |                                 |
| <b>INTRODUCTION</b>           |        |                                                                                                                                                                                                                                                                                                      |                                 |
| Rationale                     | 3      | Describe the rationale for the review in the context of existing knowledge.                                                                                                                                                                                                                          | Pg 4                            |
| Objectives                    | 4      | Provide an explicit statement of the objective(s) or question(s) the review addresses.                                                                                                                                                                                                               | Pg 4                            |
| <b>METHODS</b>                |        |                                                                                                                                                                                                                                                                                                      |                                 |
| Eligibility criteria          | 5      | Specify the inclusion and exclusion criteria for the review and how studies were grouped for the syntheses.                                                                                                                                                                                          | Pg 5                            |
| Information sources           | 6      | Specify all databases, registers, websites, organisations, reference lists and other sources searched or consulted to identify studies. Specify the date when each source was last searched or consulted.                                                                                            | Pg 4                            |
| Search strategy               | 7      | Present the full search strategies for all databases, registers and websites, including any filters and limits used.                                                                                                                                                                                 | Pg 4/5                          |
| Selection process             | 8      | Specify the methods used to decide whether a study met the inclusion criteria of the review, including how many reviewers screened each record and each report retrieved, whether they worked independently, and if applicable, details of automation tools used in the process.                     | Pg 5                            |
| Data collection process       | 9      | Specify the methods used to collect data from reports, including how many reviewers collected data from each report, whether they worked independently, any processes for obtaining or confirming data from study investigators, and if applicable, details of automation tools used in the process. | Pg 5                            |
| Data items                    | 10a    | List and define all outcomes for which data were sought. Specify whether all results that were compatible with each outcome domain in each study were sought (e.g. for all measures, time points, analyses), and if not, the methods used to decide which results to collect.                        | Pg 5/6                          |
|                               | 10b    | List and define all other variables for which data were sought (e.g. participant and intervention characteristics, funding sources). Describe any assumptions made about any missing or unclear information.                                                                                         | Pg 5/6                          |
| Study risk of bias assessment | 11     | Specify the methods used to assess risk of bias in the included studies, including details of the tool(s) used, how many reviewers assessed each study and whether they worked independently, and if applicable, details of automation tools used in the process.                                    | Pg 6                            |
| Effect measures               | 12     | Specify for each outcome the effect measure(s) (e.g. risk ratio, mean difference) used in the synthesis or presentation of results.                                                                                                                                                                  | n/a                             |
| Synthesis methods             | 13a    | Describe the processes used to decide which studies were eligible for each synthesis (e.g. tabulating the study intervention characteristics and comparing against the planned groups for each synthesis (item #5)).                                                                                 | n/a                             |
|                               | 13b    | Describe any methods required to prepare the data for presentation or synthesis, such as handling of missing summary statistics, or data conversions.                                                                                                                                                | Pg 6                            |
|                               | 13c    | Describe any methods used to tabulate or visually display results of individual studies and syntheses.                                                                                                                                                                                               | Pg 6                            |
|                               | 13d    | Describe any methods used to synthesize results and provide a rationale for the choice(s). If meta-analysis was performed, describe the                                                                                                                                                              | Pg 6                            |

| Section and Topic             | Item # | Checklist item                                                                                                                                                                                                                                                                       | Location where item is reported |
|-------------------------------|--------|--------------------------------------------------------------------------------------------------------------------------------------------------------------------------------------------------------------------------------------------------------------------------------------|---------------------------------|
|                               |        | model(s), method(s) to identify the presence and extent of statistical heterogeneity, and software package(s) used.                                                                                                                                                                  |                                 |
|                               | 13e    | Describe any methods used to explore possible causes of heterogeneity among study results (e.g. subgroup analysis, meta-regression).                                                                                                                                                 | n/a                             |
|                               | 13f    | Describe any sensitivity analyses conducted to assess robustness of the synthesized results.                                                                                                                                                                                         | n/a                             |
| Reporting bias assessment     | 14     | Describe any methods used to assess risk of bias due to missing results in a synthesis (arising from reporting biases).                                                                                                                                                              | n/a                             |
| Certainty assessment          | 15     | Describe any methods used to assess certainty (or confidence) in the body of evidence for an outcome.                                                                                                                                                                                | n/a                             |
| <b>RESULTS</b>                |        |                                                                                                                                                                                                                                                                                      |                                 |
| Study selection               | 16a    | Describe the results of the search and selection process, from the number of records identified in the search to the number of studies included in the review, ideally using a flow diagram.                                                                                         | Pg 6/7                          |
|                               | 16b    | Cite studies that might appear to meet the inclusion criteria, but which were excluded, and explain why they were excluded.                                                                                                                                                          |                                 |
| Study characteristics         | 17     | Cite each included study and present its characteristics.                                                                                                                                                                                                                            | Pg 7                            |
| Risk of bias in studies       | 18     | Present assessments of risk of bias for each included study.                                                                                                                                                                                                                         | Pg 14/<br>supplementary file    |
| Results of individual studies | 19     | For all outcomes, present, for each study: (a) summary statistics for each group (where appropriate) and (b) an effect estimate and its precision (e.g. confidence/credible interval), ideally using structured tables or plots.                                                     | n/a                             |
| Results of syntheses          | 20a    | For each synthesis, briefly summarise the characteristics and risk of bias among contributing studies.                                                                                                                                                                               | Pg 8 -14                        |
|                               | 20b    | Present results of all statistical syntheses conducted. If meta-analysis was done, present for each the summary estimate and its precision (e.g. confidence/credible interval) and measures of statistical heterogeneity. If comparing groups, describe the direction of the effect. | Pg 8-14                         |
|                               | 20c    | Present results of all investigations of possible causes of heterogeneity among study results.                                                                                                                                                                                       | n/a                             |
|                               | 20d    | Present results of all sensitivity analyses conducted to assess the robustness of the synthesized results.                                                                                                                                                                           | n/a                             |
| Reporting biases              | 21     | Present assessments of risk of bias due to missing results (arising from reporting biases) for each synthesis assessed.                                                                                                                                                              | n/a                             |
| Certainty of evidence         | 22     | Present assessments of certainty (or confidence) in the body of evidence for each outcome assessed.                                                                                                                                                                                  | n/a                             |
| <b>DISCUSSION</b>             |        |                                                                                                                                                                                                                                                                                      |                                 |
| Discussion                    | 23a    | Provide a general interpretation of the results in the context of other evidence.                                                                                                                                                                                                    | Pg 15-16                        |
|                               | 23b    | Discuss any limitations of the evidence included in the review.                                                                                                                                                                                                                      | Pg 16                           |
|                               | 23c    | Discuss any limitations of the review processes used.                                                                                                                                                                                                                                | Pg 16                           |
|                               | 23d    | Discuss implications of the results for practice, policy, and future research.                                                                                                                                                                                                       | Pg 16/17                        |



| Section and Topic                              | Item # | Checklist item                                                                                                                                                                                                                             | Location where item is reported |
|------------------------------------------------|--------|--------------------------------------------------------------------------------------------------------------------------------------------------------------------------------------------------------------------------------------------|---------------------------------|
| <b>OTHER INFORMATION</b>                       |        |                                                                                                                                                                                                                                            |                                 |
| Registration and protocol                      | 24a    | Provide registration information for the review, including register name and registration number, or state that the review was not registered.                                                                                             | Pg 4                            |
|                                                | 24b    | Indicate where the review protocol can be accessed, or state that a protocol was not prepared.                                                                                                                                             | Pg 4                            |
|                                                | 24c    | Describe and explain any amendments to information provided at registration or in the protocol.                                                                                                                                            | Supplementary file              |
| Support                                        | 25     | Describe sources of financial or non-financial support for the review, and the role of the funders or sponsors in the review.                                                                                                              | Pg 17                           |
| Competing interests                            | 26     | Declare any competing interests of review authors.                                                                                                                                                                                         | Pg 17                           |
| Availability of data, code and other materials | 27     | Report which of the following are publicly available and where they can be found: template data collection forms; data extracted from included studies; data used for all analyses; analytic code; any other materials used in the review. | Pg 18                           |

**SupplementaryTable 5.** *List of all features and behaviours used in the studies*

| <b>Behaviour</b>                               | <b>Feature</b>                                    | <b>Number of times used</b> |
|------------------------------------------------|---------------------------------------------------|-----------------------------|
| Environment                                    | Ambient sound                                     | 5                           |
|                                                | Ambient light                                     | 8                           |
| Location or mobility                           | Distance travelled                                | 19                          |
|                                                | Distance from home                                | 11                          |
|                                                | Time spent at home/primary location               | 20                          |
|                                                | Time spent away from home/ primary location       | 3                           |
|                                                | Number of unique or significant locations         | 17                          |
|                                                | Location entropy                                  | 9                           |
|                                                | Flight length                                     | 8                           |
|                                                | Flight duration                                   | 9                           |
|                                                | Duration spent stationary                         | 6                           |
|                                                | Radius of gyration                                | 5                           |
| Phone use                                      | Number of incoming/outgoing calls                 | 15                          |
|                                                | Duration of incoming/outgoing calls               | 12                          |
|                                                | Call responsiveness/reciprocity                   | 5                           |
|                                                | Number of incoming/outgoing text messages         | 16                          |
|                                                | Length of incoming/outgoing text messages         | 4                           |
|                                                | Text responsiveness/reciprocity                   | 4                           |
|                                                | Number of screen active periods                   | 3                           |
|                                                | Duration of screen active/unlock periods          | 11                          |
|                                                | Number of screen checks                           | 2                           |
|                                                | Phone use during sleep                            | 1                           |
|                                                | Number of apps used                               | 3                           |
| Physical activity                              | Mean acceleration/activity count                  | 31                          |
|                                                | Total acceleration/ activity count                | 28                          |
|                                                | Movement index                                    | 9                           |
|                                                | Duration of uninterrupted mobility periods (MIP)  | 8                           |
|                                                | Duration of still or sedentary periods            | 41                          |
|                                                | Duration of active periods                        | 24                          |
|                                                | Duration of light activity periods                | 26                          |
|                                                | Duration of moderate activity periods             | 23                          |
|                                                | Duration of vigorous activity periods             | 21                          |
|                                                | Duration of moderate or vigorous activity periods | 22                          |
|                                                | Step count                                        | 41                          |
|                                                | Distance walked on foot                           | 1                           |
|                                                | Duration of walking time                          | 11                          |
|                                                | Energy expenditure                                | 13                          |
|                                                | Rest-activity rhythm L5                           | 6                           |
|                                                | Rest-activity rhythm M10                          | 6                           |
|                                                | Rest-activity rhythm relative amplitude           | 9                           |
| Rest-activity rhythm intraday stability (IS)   | 9                                                 |                             |
| Rest-activity rhythm intraday variability (IV) | 10                                                |                             |
| Rest-activity rhythm entropy                   | 6                                                 |                             |
| Physiology                                     | Heart rate                                        | 14                          |
|                                                | Heart rate variability                            | 6                           |
|                                                | EDA/skin conductance                              | 3                           |
|                                                | Skin temperature                                  | 1                           |
| Sleep                                          | Sleep start time                                  | 17                          |
|                                                | Sleep end time                                    | 16                          |
|                                                | Sleep midpoint                                    | 2                           |
|                                                | Duration of sleep/ total sleep time (TST)         | 50                          |
|                                                | Duration of time in bed                           | 10                          |
|                                                | Sleep wake ratio/ proportion of time asleep       | 6                           |
|                                                | Number of wake events during sleep                | 19                          |
|                                                | Duration of wake after sleep onset (WASO)         | 23                          |
|                                                | Duration of sleep onset latency (SOL)             | 25                          |
| Sleep efficiency (SE)                          | 32                                                |                             |

|                  |                                                  |    |
|------------------|--------------------------------------------------|----|
|                  | Sleep fragmentation                              | 5  |
|                  | Sleep stages (REM/light etc)                     | 4  |
|                  | Duration of daytime sleep                        | 3  |
| Sociability      | Number of social interactions or conversations   | 8  |
|                  | Duration of social interactions or conversations | 14 |
|                  | Quality of social interactions                   | 1  |
| Circadian rhythm | Mobility routine                                 | 7  |
|                  | Physical activity                                | 22 |
|                  | Phone use                                        | 1  |
|                  | Sleep                                            | 20 |
|                  | Physiology                                       | 1  |
|                  | Sociability                                      | 1  |
| Data quantity    | Missing GPS data                                 | 4  |
|                  | Missing phone use data                           | 1  |
|                  | Device wear time                                 | 7  |
|                  | Amount of data collected                         | 2  |

**Supplementary Table 6.** *List of all features by device type*

| Device type                | Feature                                | n  |
|----------------------------|----------------------------------------|----|
| Accelerometers             | sleep_duration_tst                     | 35 |
|                            | pa_duration_still_sedentary            | 29 |
|                            | sleep_efficiency                       | 29 |
|                            | pa_duration_lpa                        | 24 |
|                            | pa_mean_acceleration_activity_count    | 23 |
|                            | pa_total_acceleration_activity_count   | 23 |
|                            | sleep_onset_latency                    | 23 |
|                            | sleep_waso                             | 21 |
|                            | pa_duration_mvpa                       | 19 |
|                            | circadian_sleep                        | 18 |
|                            | pa_duration_mpa                        | 18 |
|                            | circadian_pa                           | 16 |
|                            | pa_duration_vpa                        | 16 |
|                            | sleep_wake_events_arousals             | 16 |
|                            | sleep_start_time                       | 13 |
|                            | sleep_end_time                         | 12 |
|                            | pa_duration_active                     | 10 |
|                            | pa_energy_expenditure                  | 10 |
|                            | pa_step_count                          | 10 |
|                            | sleep_tib                              | 10 |
|                            | pa_duration_uninterrupted_mobility_mip | 8  |
|                            | pa_movement_index                      | 8  |
|                            | pa_ra_iv                               | 7  |
|                            | pa_ra_is                               | 6  |
|                            | pa_ra_ra                               | 6  |
|                            | sleep_fragmentation                    | 5  |
|                            | sleep_wake_ratio_prop_asleep           | 4  |
|                            | env_ambient_light                      | 3  |
|                            | pa_duration_walking                    | 3  |
|                            | pa_ra_l5                               | 3  |
|                            | pa_ra_m10                              | 3  |
|                            | sleep_daytime_duration                 | 3  |
|                            | pa_ra_entropy                          | 2  |
| sleep_midpoint             | 2                                      |    |
| sleep_stages_duration_type | 1                                      |    |
| Other Wearable             | phys_heart_rate                        | 8  |
|                            | pa_step_count                          | 7  |

|                  |                                        |    |
|------------------|----------------------------------------|----|
|                  | pa_duration_still_sedentary            | 6  |
|                  | pa_duration_mpa                        | 5  |
|                  | pa_duration_vpa                        | 5  |
|                  | circadian_pa                           | 3  |
|                  | pa_duration_active                     | 3  |
|                  | pa_duration_mvpa                       | 3  |
|                  | pa_mean_acceleration_activity_count    | 3  |
|                  | pa_ra_entropy                          | 3  |
|                  | pa_total_acceleration_activity_count   | 3  |
|                  | phys_eda_skin_conductance              | 3  |
|                  | phys_heart_rate_variability            | 3  |
|                  | sleep_duration_tst                     | 3  |
|                  | pa_duration_lpa                        | 2  |
|                  | pa_energy_expenditure                  | 2  |
|                  | pa_ra_is                               | 2  |
|                  | pa_ra_iv                               | 2  |
|                  | pa_ra_l5                               | 2  |
|                  | pa_ra_m10                              | 2  |
|                  | pa_ra_ra                               | 2  |
|                  | sleep_efficiency                       | 1  |
|                  | sleep_onset_latency                    | 1  |
|                  | sleep_stages_duration_type             | 1  |
|                  | sleep_wake_events_arousals             | 1  |
|                  | sleep_waso                             | 1  |
| Pedometer        | pa_step_count                          | 11 |
|                  | pa_duration_walking                    | 1  |
|                  | pa_energy_expenditure                  | 1  |
| Smartphone       | loc_time_spent_primary_loc_home        | 20 |
|                  | loc_distance_travelled                 | 19 |
|                  | loc_no_unique_locations                | 17 |
|                  | phone_no_incoming_outgoing_text        | 16 |
|                  | phone_no_incoming_outgoing_calls       | 15 |
|                  | phone_duration_incoming_outgoing_calls | 12 |
|                  | loc_distance_from_home_primary         | 11 |
|                  | phone_duration_screen_active_unlock    | 11 |
|                  | loc_flight_duration                    | 9  |
|                  | loc_location_entropy                   | 9  |
|                  | loc_flight_length                      | 8  |
|                  | sleep_duration_tst                     | 8  |
|                  | circadian_mobility_routine             | 7  |
|                  | loc_duration_stationary                | 6  |
|                  | pa_duration_active                     | 6  |
|                  | env_ambient_sound                      | 5  |
|                  | loc_radius_of_gyration                 | 5  |
|                  | pa_duration_still_sedentary            | 5  |
|                  | phone_call_responsiveness_reciprocity  | 5  |
|                  | env_ambient_light                      | 4  |
|                  | loc_no_flights                         | 4  |
|                  | pa_mean_acceleration_activity_count    | 4  |
|                  | phone_app_usage                        | 4  |
|                  | phone_length_incoming_outgoing_texts   | 4  |
|                  | phone_text_responsiveness              | 4  |
|                  | loc_time_away_from_primary             | 3  |
|                  | sleep_end_time                         | 3  |
| sleep_start_time | 3                                      |    |

|                                       |                                      |    |
|---------------------------------------|--------------------------------------|----|
|                                       | circadian_pa                         | 2  |
|                                       | pa_duration_walking                  | 2  |
|                                       | phone_no_screen_active_periods       | 2  |
|                                       | phone_screen_checks                  | 2  |
|                                       | circadian_sleep                      | 1  |
|                                       | env_environment_type                 | 1  |
|                                       | pa_movement_index                    | 1  |
|                                       | pa_ra_entropy                        | 1  |
|                                       | pa_ra_is                             | 1  |
|                                       | pa_ra_iv                             | 1  |
|                                       | pa_ra_l5                             | 1  |
|                                       | pa_ra_m10                            | 1  |
|                                       | pa_ra_ra                             | 1  |
|                                       | pa_total_acceleration_activity_count | 1  |
|                                       | sleep_wake_events_arousals           | 1  |
| Smartwatch or Commercial Fitness Band | pa_step_count                        | 13 |
|                                       | phys_heart_rate                      | 6  |
|                                       | pa_duration_active                   | 5  |
|                                       | pa_duration_walking                  | 5  |
|                                       | sleep_duration_tst                   | 4  |
|                                       | phys_heart_rate_variability          | 3  |
|                                       | sleep_efficiency                     | 2  |
|                                       | sleep_stages_duration_type           | 2  |
|                                       | sleep_wake_ratio_prop_asleep         | 2  |
|                                       | circadian_pa                         | 1  |
|                                       | circadian_sleep                      | 1  |
|                                       | env_ambient_light                    | 1  |
|                                       | pa_duration_still_sedentary          | 1  |
|                                       | pa_mean_acceleration_activity_count  | 1  |
|                                       | pa_total_acceleration_activity_count | 1  |
|                                       | phone_no_screen_active_periods       | 1  |
|                                       | sleep_end_time                       | 1  |
|                                       | sleep_onset_latency                  | 1  |
|                                       | sleep_start_time                     | 1  |
|                                       | sleep_wake_events_arousals           | 1  |
| sleep_waso                            | 1                                    |    |

**Supplementary Table 7.** *Summary of prediction model and prognostic factor studies.*

| <b>Aim</b>                       | <b>Article</b>      | <b>Device</b> | <b>Outcome</b>                                    | <b>Behaviours</b>                                                                                  | <b>Model</b>                                                                                                | <b>Key findings</b>                                                                                                                                                                                            |
|----------------------------------|---------------------|---------------|---------------------------------------------------|----------------------------------------------------------------------------------------------------|-------------------------------------------------------------------------------------------------------------|----------------------------------------------------------------------------------------------------------------------------------------------------------------------------------------------------------------|
| <b>Predicting ASM/EMA scores</b> | Adler 2022          | Smartphone    | EMA score for sleep and stress                    | Location/mobility, phone use, physical activity, sleep, sociability, missing data                  | Gradient boosted regression trees                                                                           | FNN autoencoder achieved median sensitivity of 0.25 and specificity of 0.88 at predicting anomalies. Features that had greatest effect varied between participants who relapsed.                               |
|                                  | He-Yueya et al 2020 | Smartphone    | Overall EMA score                                 | Environment, phone use, physical activity, sleep, sociability, circadian rhythm                    | Gradient boosted regression trees                                                                           | Models predicting EMA scores from stability index 7 days in advance MAE 2.266, 14 days in advance MAE 2.553. Previous EMA score was best performing model MAE 2.061                                            |
|                                  | Mandel et al 2023   | Smartphone    | EMA scores for depression and anxiety             | Location/mobility, physical activity, circadian rhythm                                             | Generalised neural network mixed model                                                                      | GNMM with two layers had lowest MSPE in predicting anxiety (0.062) and depression scores (0.428)                                                                                                               |
|                                  | Mulligan et al 2016 | Actigraph     | EMA scores for psychotic symptoms and functioning | Sleep                                                                                              | Mixed effects regression                                                                                    | Sleep duration and quality measures predicted next day functioning and next day psychotic symptoms, after adjusting for baseline PANSS score.                                                                  |
|                                  | Tseng et al 2020    | Smartphone    | EMA scores - 10 domains                           | Environment, location/mobility, phone use, physical activity, sleep, sociability, circadian rhythm | Multiple multi-task and single-task learning algorithms, and m-SVR to predict EMA scores. K-means algorithm | m-SVR with RBF kernel model had lowest median RMSE (0.314) in test data for predicting scores. Phone usage had highest feature weight for predicting all EMA domains except thinking clearly and feeling calm. |

|                                         |                           |            |                                        |                                                                                       |                                                  |                                                                                                                                                                                       |
|-----------------------------------------|---------------------------|------------|----------------------------------------|---------------------------------------------------------------------------------------|--------------------------------------------------|---------------------------------------------------------------------------------------------------------------------------------------------------------------------------------------|
|                                         |                           |            |                                        |                                                                                       | to cluster feature weights                       |                                                                                                                                                                                       |
| <b>Identifying/predicting anomalies</b> | Adler et al 2020          | Smartphone | Behavioural anomalies prior to relapse | Location/mobility, phone use, physical activity, sleep, circadian rhythm, sociability | Encoder-decoder neural networks                  | Median sensitivity 0.25 (IQR 0.15-1.00) & specificity 0.88 (IQR 0.14-0.96) for FNN AD algorithm at detecting anomalies                                                                |
|                                         | Barnett et al 2018        | Smartphone | Behavioural anomalies prior to relapse | Location/mobility, phone use, circadian rhythm, sociability                           | Multivariate timeseries anomaly detection method | Overall mobility features had highest median number of anomalies. For individuals who relapsed the rate of anomalies within 2 weeks before relapse was 71% higher than in other weeks |
|                                         | Buck et al 2019           | Smartphone | Behavioural anomalies prior to relapse | Phone use, sociability                                                                | Generalised estimated equations                  | Daily outgoing call duration, no. of incoming and outgoing text messages lower on average in days preceding relapse, but did vary when day split up into 4 periods.                   |
|                                         | Cohen et al 2023          | Smartphone | Behavioural anomalies prior to relapse | Location/mobility, phone use, sociability, sleep                                      | Multivariate timeseries anomaly detection method | Model combining passive and active symptom data performed better than active symptom data alone                                                                                       |
|                                         | Henson et al 2021         | Smartphone | Behavioural anomalies prior to relapse | Location/mobility, phone use, sociability, sleep                                      | Multivariate timeseries anomaly detection method | Mobility, sociability, sleep and screen time features had higher rates of anomalies than EMA or cognitive test scores.                                                                |
|                                         | Zlatinsi et al et al 2022 | Smartwatch | Behavioural anomalies prior to relapse | Physical activity, physiology, sleep                                                  | Transformers, FNN, CNN, GRU                      | CNN model highest median ROC-AUC (0.61) and PR-AUC (0.76) for personalised models. Model including accelerometer and HR data                                                          |

|                                                     |                        |                               |                                                                     |                                                                                  |                                                                       |                                                                                                                                                                                                                    |
|-----------------------------------------------------|------------------------|-------------------------------|---------------------------------------------------------------------|----------------------------------------------------------------------------------|-----------------------------------------------------------------------|--------------------------------------------------------------------------------------------------------------------------------------------------------------------------------------------------------------------|
|                                                     |                        |                               |                                                                     |                                                                                  |                                                                       | had highest PR-AUC (0.76) but HR only model had highest ROC-AUC (0.52)                                                                                                                                             |
| <b>Identifying/predicting relapse</b>               | Lamichhan e et al 2023 | Smartphone                    | Relapse (7 days)                                                    | Environment, location/mobility, phone use, physical activity, sociability        | LSTM based deep learning model                                        | Model achieved F2 score of 0.52 in test data, higher than encoder-decoder model                                                                                                                                    |
|                                                     | Zhou et al 2022        | Smartphone                    | Relapse (7 days)                                                    | Environment, location/mobility, phone use, physical activity, sleep, sociability | Balanced RF for prediction, GMM and PAM for deriving cluster features | Model with baseline passive features and clustering features highest F2 score (0.23). Most significant features included distance travelled, conversation and sound level metrics, along with clustering features. |
| <b>Classification of psychosis or schizophrenia</b> | Narkhede et al 2022    | Smartphone and wrist wearable | Classification of psychosis and healthy controls                    | Location/mobility, physical activity                                             | RF, k-nearest neighbours, logistic regression                         | Random forest models outperformed others, AUC ranged from 0.818 to 0.845. Passive features identified as significant were distance from home and acceleration metrics.                                             |
|                                                     | Nguyen et al 2022      | Actigraph                     | Classification of schizophrenia, mood disorder and healthy controls | Physical activity                                                                | Convolutional and recurrent neural networks                           | On average CNN models performed with greater accuracy ( $0.74 \pm 0.02$ vs $0.68 \pm 0.05$ ) and precision ( $0.70 \pm 0.02$ vs $0.66 \pm 0.04$ ) than RNN models                                                  |
|                                                     | Osipov et al 2015      | Wearable adhesive patch       | Classification of schizophrenia from healthy controls               | Physical activity, physiology                                                    | Support vector machine with mRMR for feature selection                | Model with combination of HR (mean and MSE), physical activity (mode and SD) and transfer entropy features had highest accuracy (95.3%), sensitivity                                                               |



|  |                           |                         |                                                                                 |                                     |                                                        |                                                                                                                                                                              |
|--|---------------------------|-------------------------|---------------------------------------------------------------------------------|-------------------------------------|--------------------------------------------------------|------------------------------------------------------------------------------------------------------------------------------------------------------------------------------|
|  |                           |                         |                                                                                 |                                     |                                                        | (98%), specificity (91.1%) and AUC (0.99)                                                                                                                                    |
|  | Price et al 2022          | Actigraph               | classification of schizophrenia, major depressive disorder and healthy controls | Physical activity, circadian rhythm | Unsupervised clustering algorithm (UMAP)               | Subjects with common diagnosis tended to cluster together. SHAP values showed SZ subjects had decreased diurnal regularity and activity in early morning hours.              |
|  | Reinertsen et al 2017     | Wearable adhesive patch | Classification of schizophrenia from healthy controls                           | Physical activity, physiology       | Support vector machine                                 | Model with HR and activity data for 8-day window highest AUC (0.96) vs HR (0.90) or activity (0.89) data alone. 11 most predictive features in model identified.             |
|  | Reinertsen et al 2018     | Wearable adhesive patch | Classification of schizophrenia from healthy controls                           | Physical activity, physiology       | Support vector machine with mSNR for feature selection | 4 models achieved AUC of 1.00 in test data, combinations of MSNR, MSE and MTE                                                                                                |
|  | Rodrigues-Ruiz et al 2022 | Actigraph               | classification of schizophrenia, major depressive disorder and healthy controls | Physical activity                   | RF, k-nearest neighbours, logistic regression          | Model with activity data from nighttime (00:00-05:59 am) had highest overall accuracy (98.24%) compared to morning (87.97%), afternoon (80.92%) or evening (89.84%) periods. |

**Supplementary Table 8. Risk of bias assessment for prognostic factor studies, using QUIPS**

| <b>Author</b>           | <b>Year</b> | <b>Title</b>                                                                                                                                                       | <b>Study Participation</b> | <b>Study Attrition</b> | <b>PF measurement</b> | <b>Outcome measurement</b> | <b>Study confounding</b> | <b>Statistical analysis and reporting</b> | <b>Overall</b> |
|-------------------------|-------------|--------------------------------------------------------------------------------------------------------------------------------------------------------------------|----------------------------|------------------------|-----------------------|----------------------------|--------------------------|-------------------------------------------|----------------|
| Adler, D. A., et al.    | 2020        | Predicting Early Warning Signs of Psychotic Relapse From Passive Sensing Data: An Approach Using Encoder-Decoder Neural Networks.                                  | Moderate                   | Low                    | Low                   | Low                        | High                     | Low                                       | High           |
| Adler, D. A., et al.    | 2022        | Machine learning for passive mental health symptom prediction: Generalization across different longitudinal mobile sensing studies.                                | High                       | High                   | Moderate              | Moderate                   | High                     | Low                                       | High           |
| Barnett, I., et al.     | 2018        | Relapse prediction in schizophrenia through digital phenotyping: a digital study                                                                                   | High                       | Low                    | Low                   | Low                        | High                     | Low                                       | High           |
| Buck, B., et al.        | 2019        | Relationships between smartphone social behavior and relapse in schizophrenia: A preliminary report.                                                               | Moderate                   | Low                    | Moderate              | Low                        | High                     | Low                                       | High           |
| Cohen, A., et al.       | 2023        | Relapse prediction in schizophrenia with smartphone digital phenotyping during COVID-19                                                                            | Moderate                   | High                   | High                  | Low                        | Moderate                 | Low                                       | High           |
| Henson, P., et al.      | 2021        | Anomaly detection to predict relapse risk in schizophrenia.                                                                                                        | High                       | Moderate               | Moderate              | Low                        | High                     | Low                                       | High           |
| He-Yueya, J., et al.    | 2020        | Assessing the relationship between routine and schizophrenia symptoms with passively sensed measures of behavioral stability.                                      | Moderate                   | Low                    | Moderate              | Low                        | High                     | Low                                       | High           |
| Mulligan, L. D., et al. | 2016        | High resolution examination of the role of sleep disturbance in predicting functioning and psychotic symptoms in schizophrenia: A novel experience sampling study. | Moderate                   | Low                    | Moderate              | Low                        | High                     | Low                                       | High           |

|                               |      |                                                                                                                                                                                         |          |      |          |      |      |     |      |
|-------------------------------|------|-----------------------------------------------------------------------------------------------------------------------------------------------------------------------------------------|----------|------|----------|------|------|-----|------|
| Narkhede, S. M., et al.       | 2022 | Machine Learning Identifies Digital Phenotyping Measures Most Relevant to Negative Symptoms in Psychotic Disorders: Implications for Clinical Trials.                                   | Moderate | High | Moderate | Low  | High | Low | High |
| Osipov, M., et al.            | 2015 | Objective identification and analysis of physiological and behavioral signs of schizophrenia.                                                                                           | High     | High | Moderate | High | High | Low | High |
| Price, G. D., et al.          | 2022 | An unsupervised machine learning approach using passive movement data to understand depression and schizophrenia.                                                                       | High     | High | High     | High | High | Low | High |
| Reinertsen, E., et al.        | 2017 | Continuous assessment of schizophrenia using heart rate and accelerometer data.                                                                                                         | High     | High | High     | High | High | Low | High |
| Reinertsen, E., et al.        | 2018 | Multiscale network dynamics between heart rate and locomotor activity are altered in schizophrenia.                                                                                     | High     | High | Moderate | High | High | Low | High |
| Rodriguez-Ruiz, J. G., et al. | 2022 | Classification of Depressive and Schizophrenic Episodes Using Night-Time Motor Activity Signal.                                                                                         | High     | High | High     | High | High | Low | High |
| Tseng, V. W. S., et al.       | 2020 | Using behavioral rhythms and multi-task learning to predict fine-grained symptoms of schizophrenia.                                                                                     | High     | Low  | Moderate | Low  | High | Low | High |
| Zlatintsi, A., et al.         | 2022 | E-Prevention: Advanced Support System for Monitoring and Relapse Prevention in Patients with Psychotic Disorders Analyzing Long-Term Multimodal Data from Wearables and Video Captures. | Moderate | High | Low      | Low  | High | Low | High |

**Supplementary Table 9.** Risk of bias assessment for prediction model studies, using PROBAST

| <b>Author</b>          | <b>Year</b> | <b>Title</b>                                                                                                                                      | <b>Participants</b> | <b>Predictors</b> | <b>Outcome</b> | <b>Analysis</b> | <b>Overall</b> |
|------------------------|-------------|---------------------------------------------------------------------------------------------------------------------------------------------------|---------------------|-------------------|----------------|-----------------|----------------|
| Zhou, J., et al.       | 2022        | Predicting Psychotic Relapse in Schizophrenia With Mobile Sensor Data: Routine Cluster Analysis.                                                  | Low                 | Low               | Low            | High            | High           |
| Nguyen, D. K., et al.  | 2022        | Decision support system for the differentiation of schizophrenia and mood disorders using multiple deep learning models on wearable devices data. | Unclear             | Unclear           | Unclear        | Unclear         | Unclear        |
| Lamichhane, B., et al. | 2023        | Psychotic Relapse Prediction in Schizophrenia Patients Using a Personalized Mobile Sensing-Based Supervised Deep Learning Model.                  | Unclear             | Low               | Low            | Unclear         | Unclear        |
